# Supplementary material for: Efficacy of Cranial Electrotherapy Stimulation Combined with Biofeedback Therapy in Patients with Functional Constipation
Source: PubMed Central journal article supplement — J Neurogastroenterol Motil. 2016 Jun 28;22(3):497–508. doi: 10.5056/jnm15089 (PMC4930306; doi:10.5056/jnm15089), 2016-06-28
Supplement: JNM-22-497_suppl.1.pdf [file JNM-22-497_suppl.1.pdf]

**Supplementary Table 1.** The Self-rating Anxiety Scale

|                                                                    | None OR A little<br>of the time | Some of<br>the time | Good part of<br>the time | Most OR<br>All of the time |
|--------------------------------------------------------------------|---------------------------------|---------------------|--------------------------|----------------------------|
| 1. I feel more nervous and anxious than usual                      |                                 |                     |                          |                            |
| 2. I feel afraid for no reason at all                              |                                 |                     |                          |                            |
| 3. I get upset easily or feel panicky                              |                                 |                     |                          |                            |
| 4. I feel like I'm falling apart and going to pieces               |                                 |                     |                          |                            |
| 5. I feel that everything is all right and nothing bad will happen |                                 |                     |                          |                            |
| 6. My arms and legs shake and tremble                              |                                 |                     |                          |                            |
| 7. I am bothered by headaches, neck and back pains                 |                                 |                     |                          |                            |
| 8. I feel weak and get tired easily                                |                                 |                     |                          |                            |
| 9. I feel calm and can sit still easily                            |                                 |                     |                          |                            |
| 10. I can feel my heart beating fast                               |                                 |                     |                          |                            |
| 11. I am bothered by dizzy spells                                  |                                 |                     |                          |                            |
| 12. I have fainting spells or feel like it                         |                                 |                     |                          |                            |
| 13. I can breathe in and out easily                                |                                 |                     |                          |                            |
| 14. I get feelings of numbness and tingling in my fingers, toes    |                                 |                     |                          |                            |
| 15. I am bothered by stomachaches or indigestion                   |                                 |                     |                          |                            |
| 16. I have to empty my bladder often                               |                                 |                     |                          |                            |
| 17. My hands are usually dry and warm                              |                                 |                     |                          |                            |
| 18. My face gets hot and blushes                                   |                                 |                     |                          |                            |
| 19. I fall asleep easily and get a good night's rest               |                                 |                     |                          |                            |
| 20. I have nightmares                                              |                                 |                     |                          |                            |
