# Supplementary material for: Efficacy of Cranial Electrotherapy Stimulation Combined with Biofeedback Therapy in Patients with Functional Constipation
Source: PubMed Central journal article supplement — J Neurogastroenterol Motil. 2016 Jun 28;22(3):497–508. doi: 10.5056/jnm15089 (PMC4930306; doi:10.5056/jnm15089), 2016-06-28
Supplement: JNM-22-497_suppl.2.pdf [file JNM-22-497_suppl.2.pdf]

**Supplementary Table 2.** The Self-rating Depression Scale

|                                                           | A little of<br>the time | Some of<br>the time | Good part of<br>the time | Most of<br>the time |
|-----------------------------------------------------------|-------------------------|---------------------|--------------------------|---------------------|
| 1. I feel down-hearted and blue                           |                         |                     |                          |                     |
| 2. Morning is when I feel the best                        |                         |                     |                          |                     |
| 3. I have crying spells or feel like it                   |                         |                     |                          |                     |
| 4. I have trouble sleeping at night                       |                         |                     |                          |                     |
| 5. I eat as much as I used to                             |                         |                     |                          |                     |
| 6. I still enjoy sex                                      |                         |                     |                          |                     |
| 7. I notice that I am losing weight                       |                         |                     |                          |                     |
| 8. I have trouble with constipation                       |                         |                     |                          |                     |
| 9. My heart beats faster than usual                       |                         |                     |                          |                     |
| 10. I get tired for no reason                             |                         |                     |                          |                     |
| 11. My mind is as clear as it used to be                  |                         |                     |                          |                     |
| 12. I find it easy to do the things I used to             |                         |                     |                          |                     |
| 13. I am restless and can't keep still                    |                         |                     |                          |                     |
| 14. I feel hopeful about the future                       |                         |                     |                          |                     |
| 15. I am more irritable than usual                        |                         |                     |                          |                     |
| 16. I find it easy to make decisions                      |                         |                     |                          |                     |
| 17. I feel that i am useful and needed                    |                         |                     |                          |                     |
| 18. My life is pretty full                                |                         |                     |                          |                     |
| 19. I feel that others would be better off if I were dead |                         |                     |                          |                     |
| 20. I still enjoy the things I used to do                 |                         |                     |                          |                     |
