# Supplementary material for: Efficacy of Cranial Electrotherapy Stimulation Combined with Biofeedback Therapy in Patients with Functional Constipation
Source: PubMed Central journal article supplement — J Neurogastroenterol Motil. 2016 Jun 28;22(3):497–508. doi: 10.5056/jnm15089 (PMC4930306; doi:10.5056/jnm15089), 2016-06-28
Supplement: JNM-22-497_suppl.3.pdf [file JNM-22-497_suppl.3.pdf]

**Supplementary Table 3.** Wexner Constipation Scoring System

| Items                                                      | Score |
|------------------------------------------------------------|-------|
| Frequency of bowel movements                               |       |
| 1-2 times per 1-2 days                                     | 0     |
| 2 times per week                                           | 1     |
| Once per week                                              | 2     |
| Less than once per week                                    | 3     |
| Less than once per month                                   | 4     |
| Difficulty: painful evacuation effort                      |       |
| Never                                                      | 0     |
| Rarely                                                     | 1     |
| Sometimes                                                  | 2     |
| Usually                                                    | 3     |
| Always                                                     | 4     |
| Completeness: feeling incomplete evacuation                |       |
| Never                                                      | 0     |
| Rarely                                                     | 1     |
| Sometimes                                                  | 2     |
| Usually                                                    | 3     |
| Always                                                     | 4     |
| Pain: abdominal pain                                       |       |
| Never                                                      | 0     |
| Rarely                                                     | 1     |
| Sometimes                                                  | 2     |
| Usually                                                    | 3     |
| Always                                                     | 4     |
| Time: minutes in lavatory per attempt                      |       |
| Less than 5                                                | 0     |
| 5-10                                                       | 1     |
| 10-20                                                      | 2     |
| 20-30                                                      | 3     |
| More than 30                                               | 4     |
| Assistance: type of assistance                             |       |
| Without assistance                                         | 0     |
| Stimulative laxatives                                      | 1     |
| Digital assistance or enema                                | 2     |
| Failure: unsuccessful attempts for evacuation per 24 hours |       |
| Never                                                      | 0     |
| 1-3                                                        | 1     |
| 3-6                                                        | 2     |
| 6-9                                                        | 3     |
| More than 9                                                | 4     |
| History: duration of constipation (yr)                     |       |
| 0                                                          | 0     |
| 1-5                                                        | 1     |
| 5-10                                                       | 2     |
| 10-20                                                      | 3     |
| More than 20                                               | 4     |
